# Supplementary material
Source: Springer Nature journal article supplement (https://www.springermedizin.de/resource/supplementary/13075_2010_2873_MOESM4_ESM.pdf/9693080)

**Biomarker Level**

**(a) Eotaxin (pg/ml)**

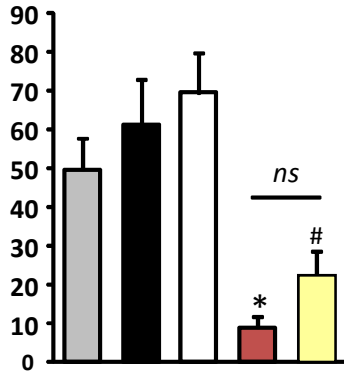

**(b) IL-6 (pg/ml)**

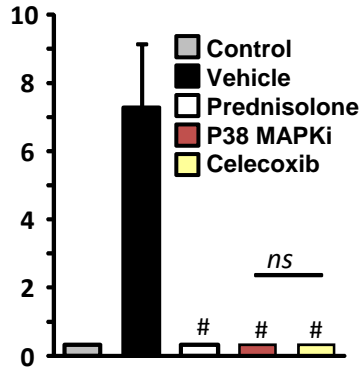

**(c) G-CSF (pg/ml)**

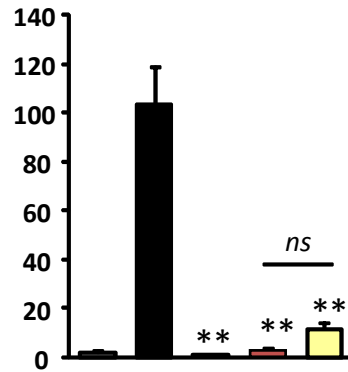

**(d) MMP-3 (ng/ml)**

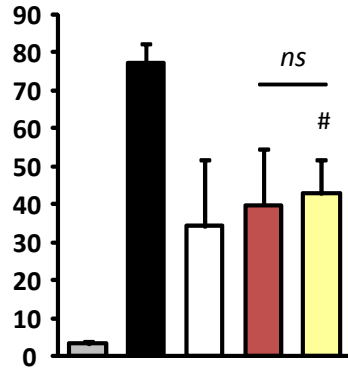

Supplement: MOESM4 [file 9693080]
